# Supplementary material for: A computational exploration of resilience and evolvability of protein–protein interaction networks
Source: PubMed Central journal article supplement (PMC8639913; doi:10.1038/s42003-021-02867-8), 2021-12-02
Supplement: 42003_2021_2867_MOESM2_ESM.pdf [file 42003_2021_2867_MOESM2_ESM.pdf]

## Description of Additional Supplementary Files

**File name:** Supplementary Data 1.

**Description:** Includes data for reproducing Figures 4, 5, and 6. Network data for recreating Figure 2 is found in the accompanying repository (<https://github.com/jkbren/presilience>; doi: 10.5281/zenodo.5507368).
